# Supplementary material
Source: publisher site journal article supplement (https://mycokeys.pensoft.net/article/29093/download/suppl/33/)

### Correlation of reads and clustered loci

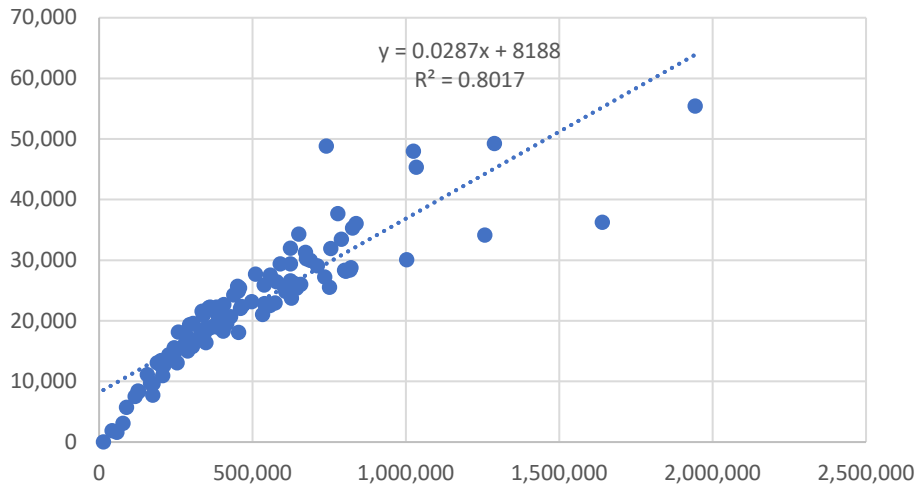

### Correlation of loci before and after mapping

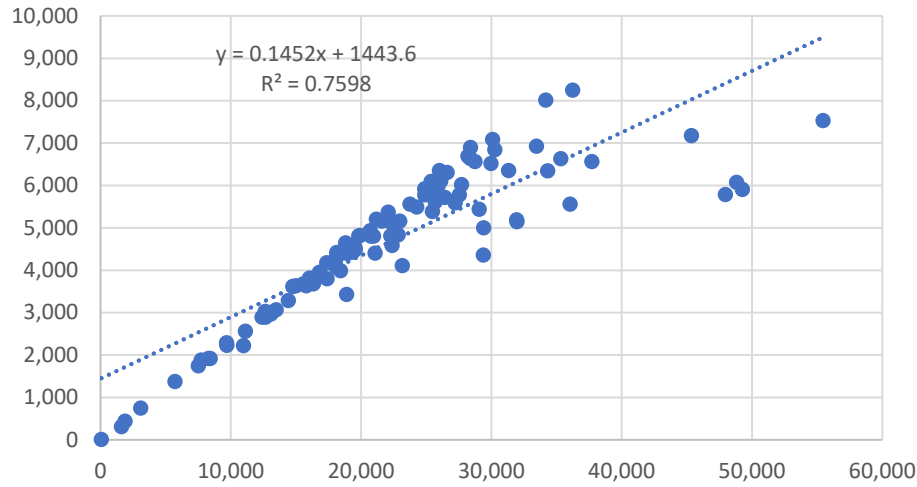

### Correlation of fungal loci and loci in final dataset

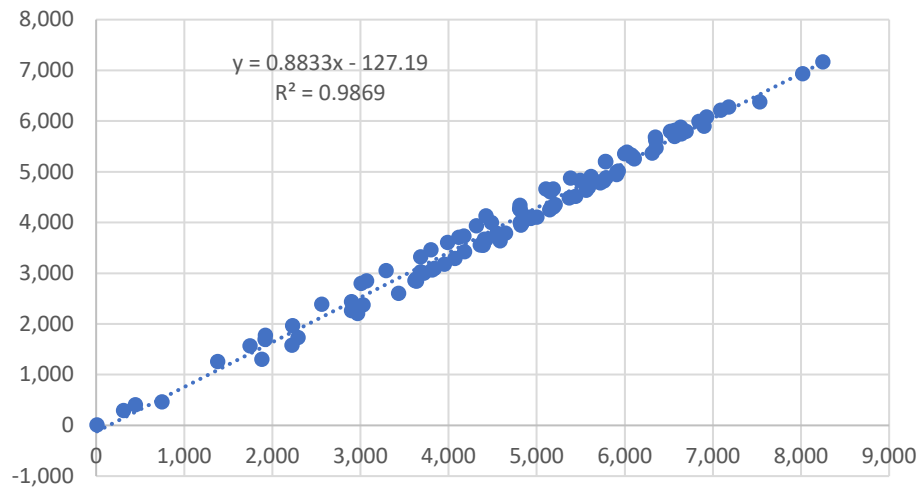

Supplement: Supplementary file 1
